# Supplementary material for: Magnetic silica beads functionalized with cobalt phthalocyanine for the oxidation of mercaptans in an alkali free aqueous medium
Source: Royal Society of Chemistry journal article supplement (doi:10.1039/c4ra02355b), 2014-06-20

## **Supporting Information**

### **Magnetic silica beads functionalized with cobalt phthalocyanine for the oxidation of mercaptans in an alkali free aqueous medium**

Garima Singh<sup>a</sup>, Praveen K. Khatri<sup>a</sup>, Sudip K. Ganguly<sup>b</sup>, Suman L. Jain<sup>a\*</sup>

<sup>a</sup>Chemical Sciences Division, CSIR-Indian Institute of Petroleum, Dehradun-248005, India; Tel.: +91-135-2525788; Fax. +91-135-2660202; Email: [suman@iip.res.in](mailto:suman@iip.res.in)

<sup>b</sup>Sweetening Area, Refining Technology Division, CSIR- Indian Institute of Petroleum, Dehradun-248005, India; Tel.: +91-135-2525784; Fax. +91-135-2660098; Email: [sganguly@iip.res.in](mailto:sganguly@iip.res.in)

**Supporting Fig. 1: XRD of the recovered catalyst after ten cycles**

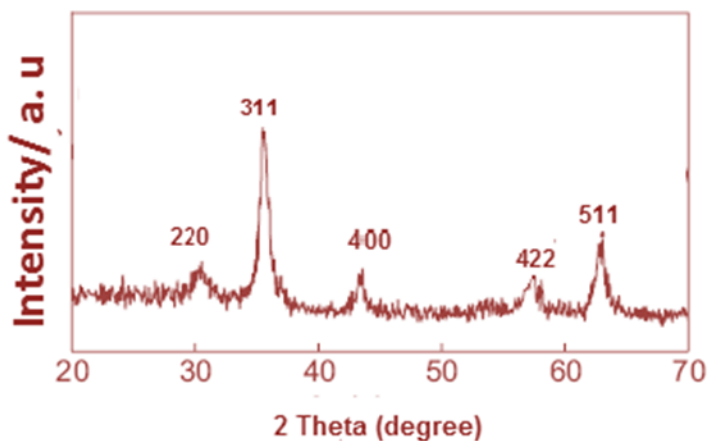

Supporting Fig. 2: FTIR spectra A) fresh; B) recovered catalyst after ten cycles

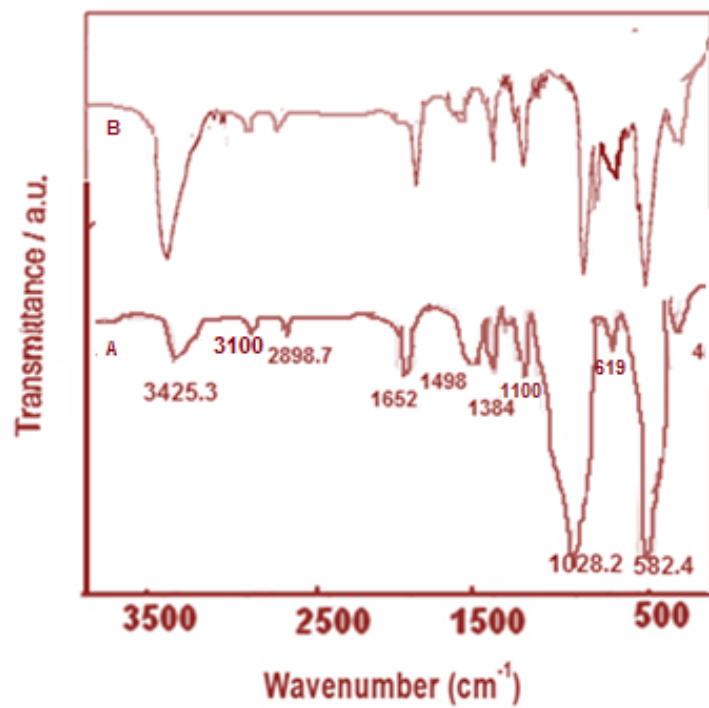

## <sup>1</sup>H NMR of the products

Table 1, entry 1

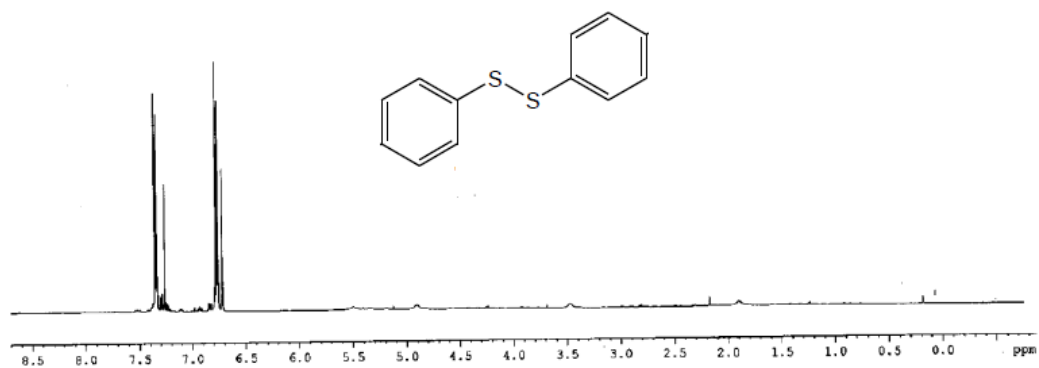

Table 1, entry 2

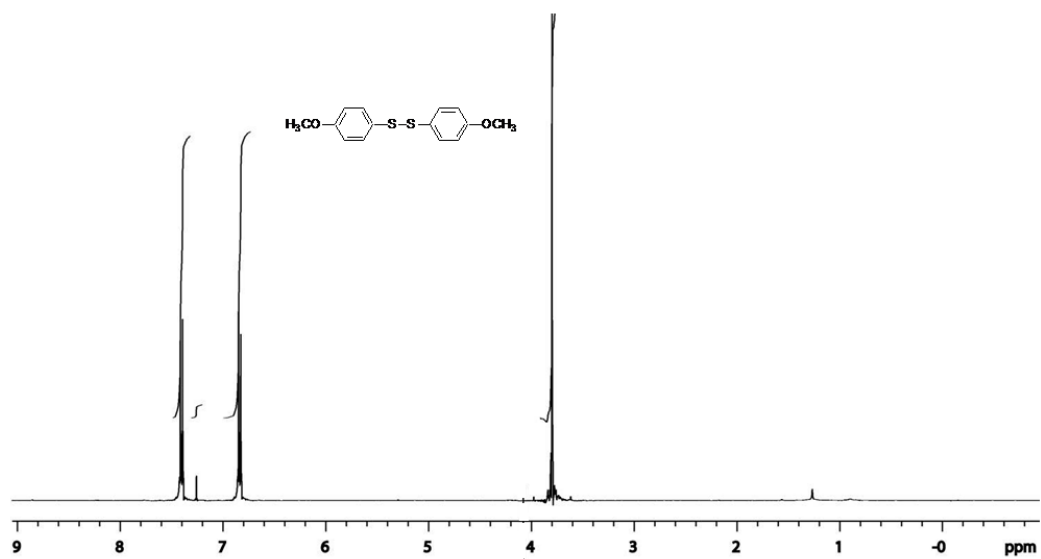

**Table 1, entry 3**

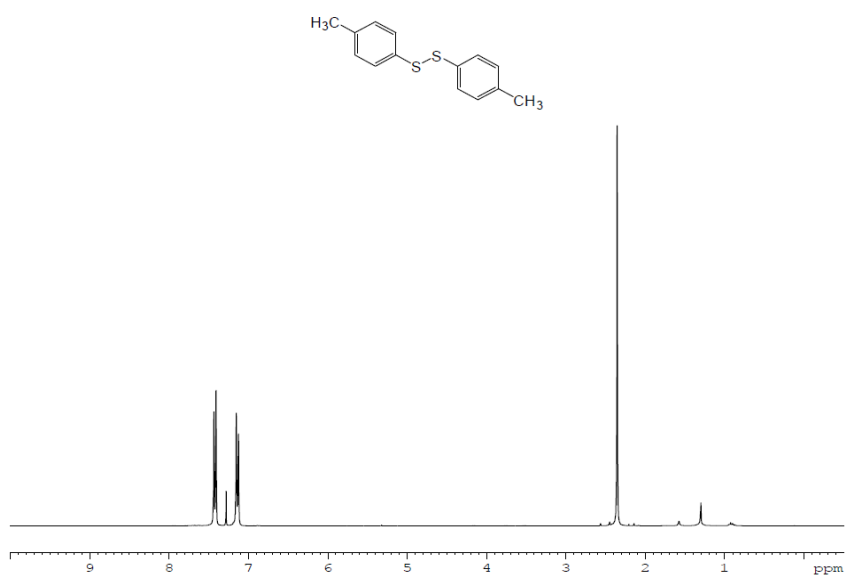

**Table 1, entry 4**

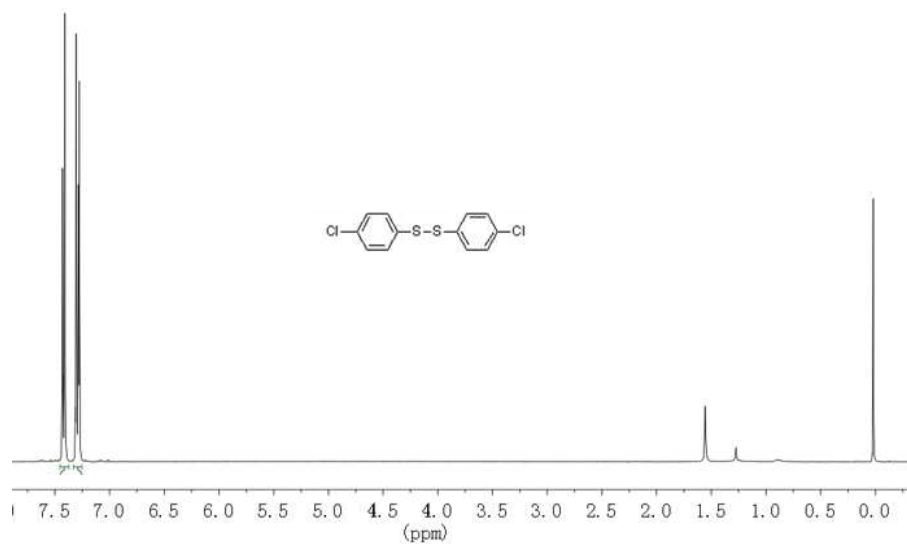

Table 1, entry 5

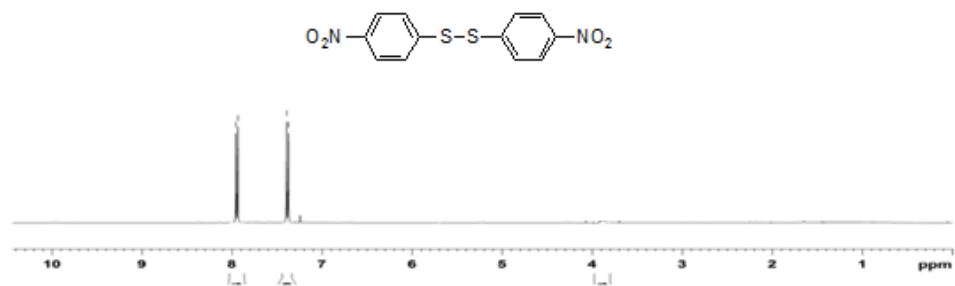

Table 1, entry 6

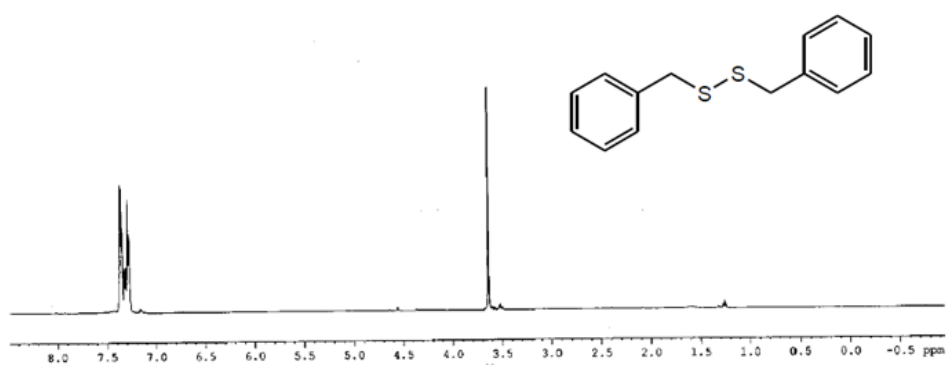

Table 1, entry 7

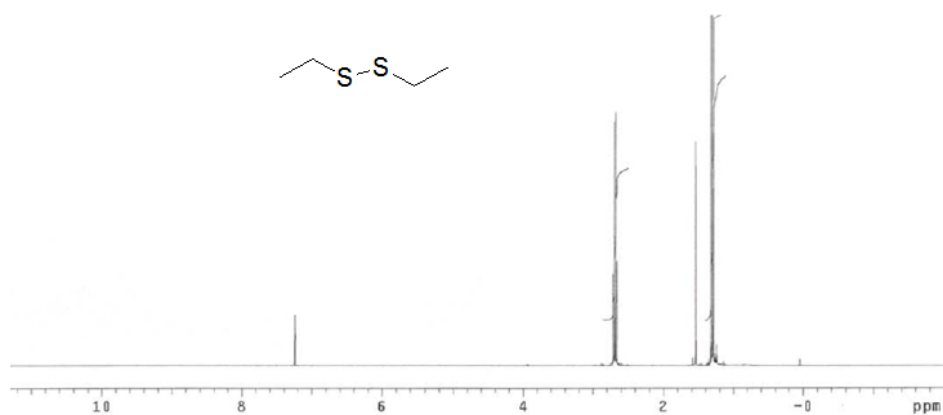

Table 1, entry 8

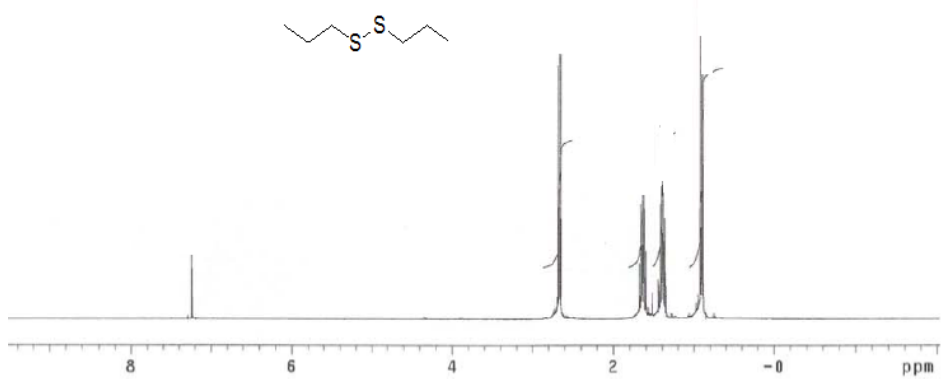

Table 1, entry 9

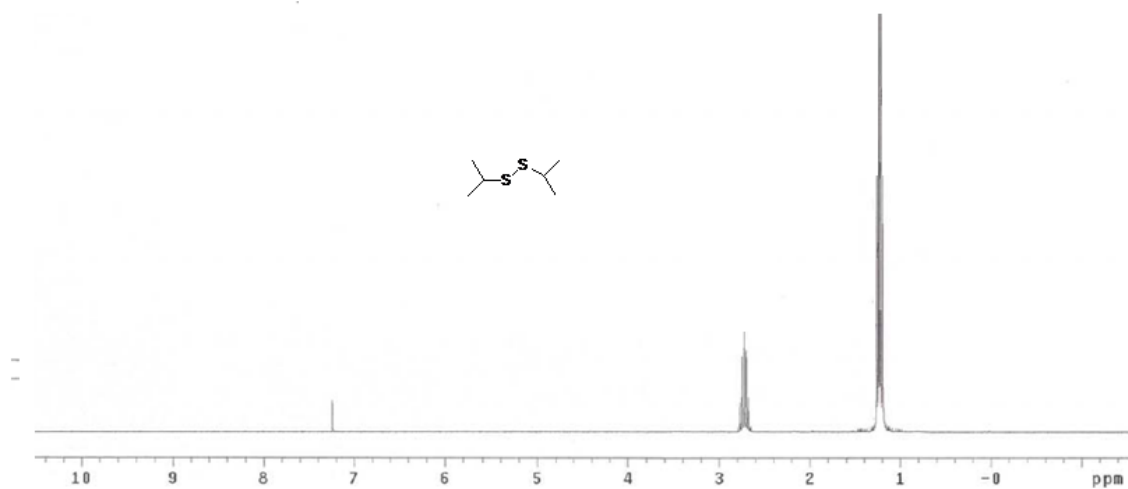

Table 1, entry 10

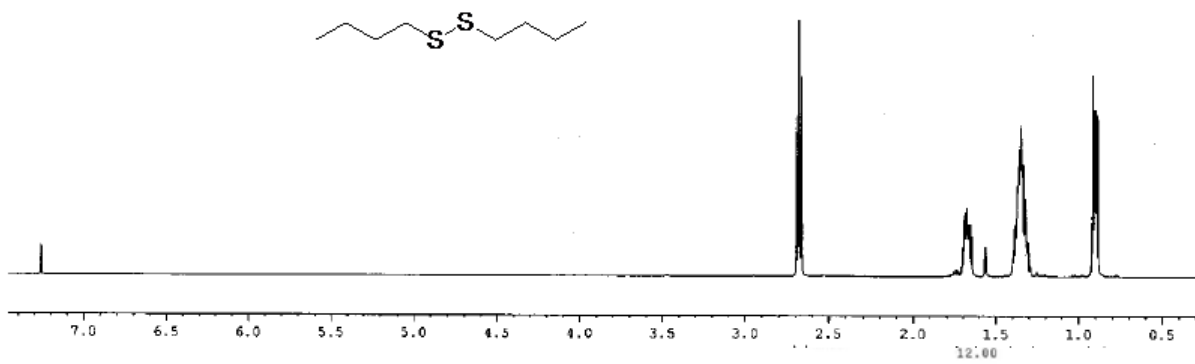

Table 1, entry 11

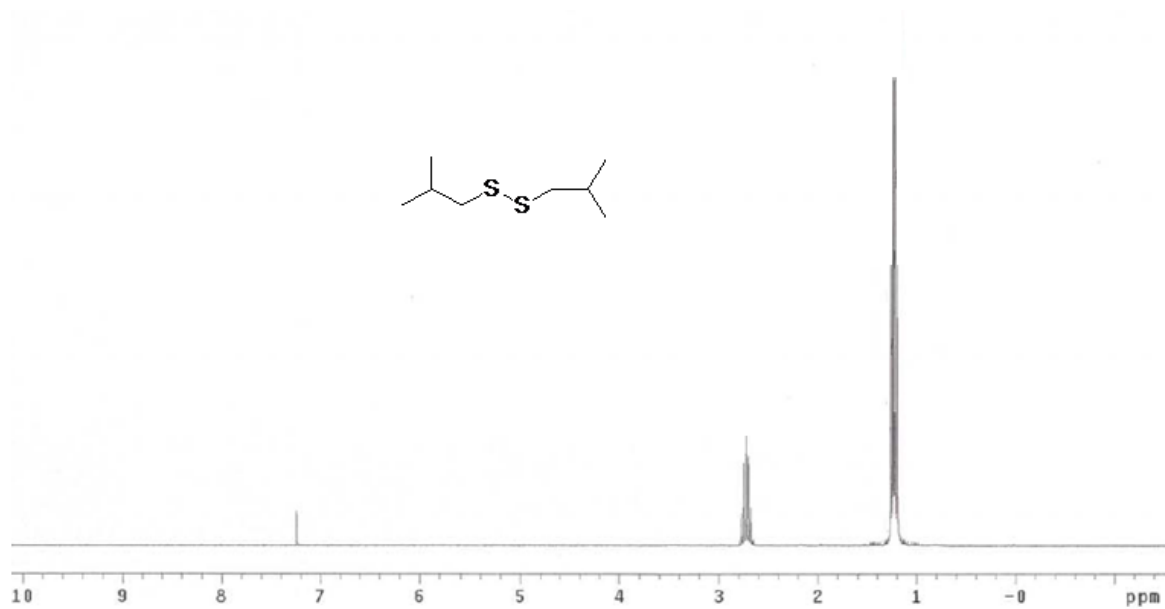

Table 1, entry 12

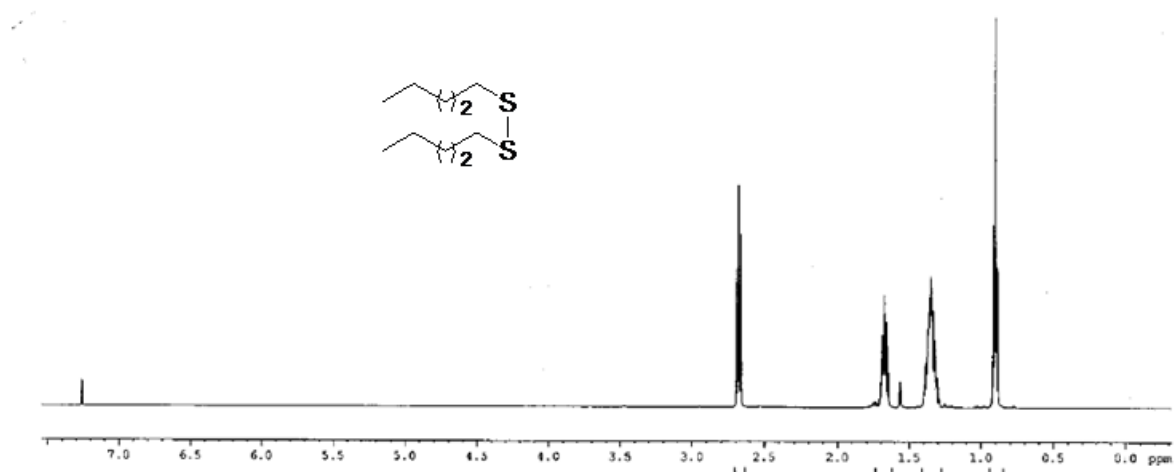



Table 1, entry 13

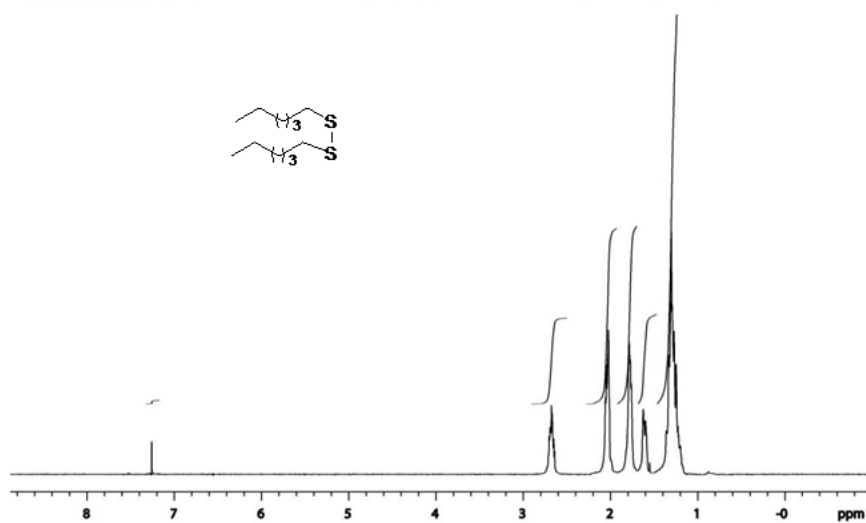

Table 1, entry 14

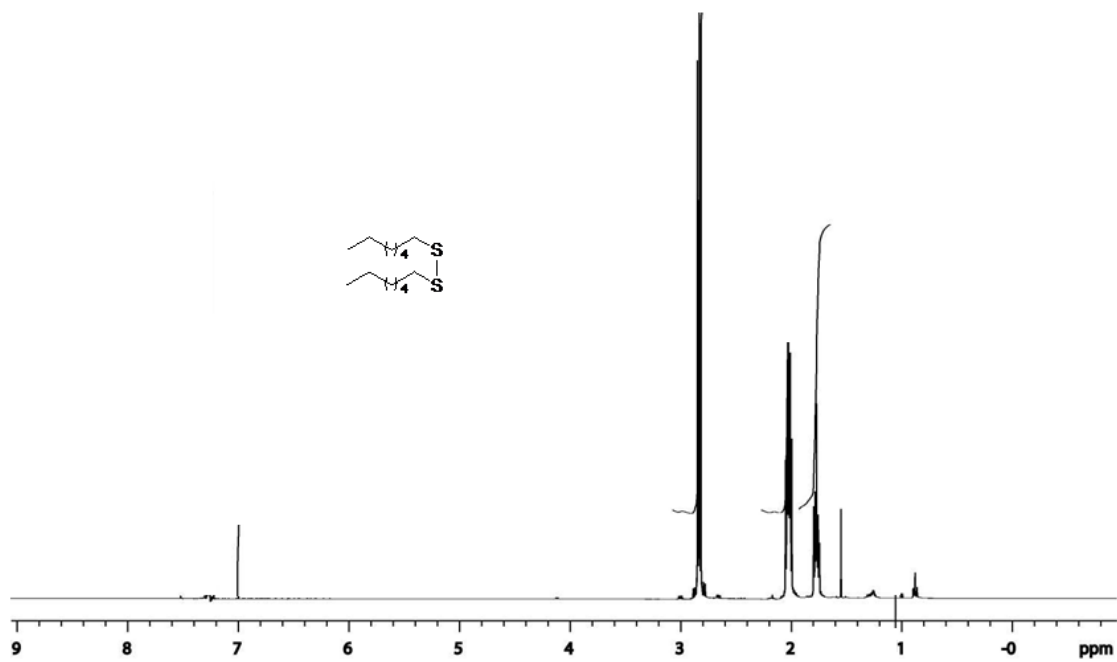

Table 1, entry 15

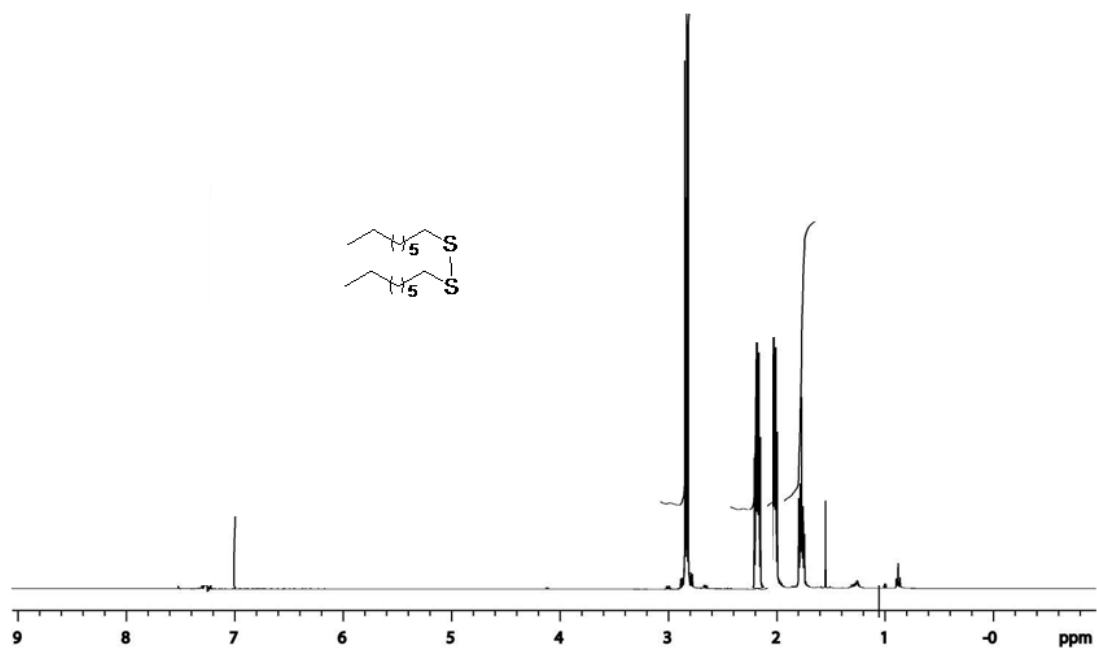

Table 1, entry 16

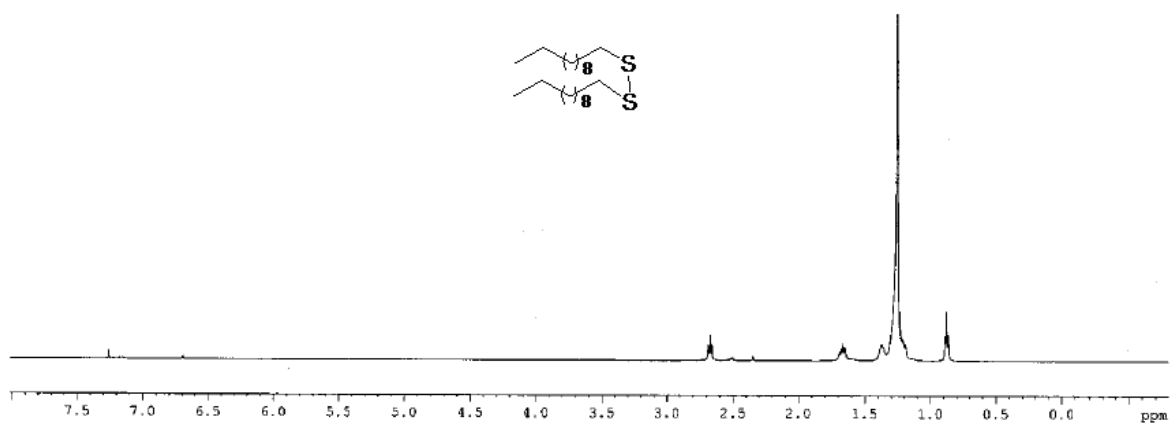

Table 1, entry 17

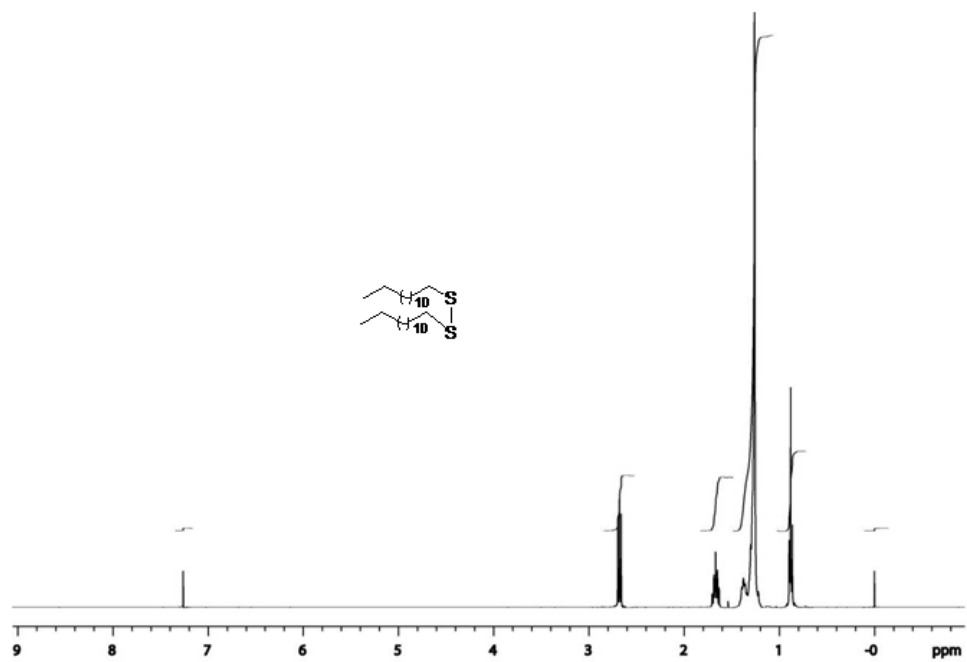

Supplement: c4ra02355b1.pdf [file c4ra02355b1.pdf]
